# Supplementary material for: Agroforestry Contributions to Urban River Rehabilitation
Source: MDPI journal article supplement (doi:10.3390/su14137657), 2022-06-23
Supplement: s1 [file s1]

Archive with 1 entries (1 files):
- sustainability-1734936-supplementary.pdf
